# Supplementary material
Source: MDPI journal article supplement (https://www.mdpi.com/2076-3417/13/5/3325)
Supplement: s1 [file s1 › applsci-2228319-supplementary.pdf]

# Anaerobic digestion of microalga *Chlorella protothecoides* and metagenomic analysis of reddish-colored digestate

Ana Eusébio <sup>1</sup>, Carla A. Santos <sup>2</sup> and Isabel Paula Marques <sup>1,\*</sup>

<sup>1</sup>LNEG—National Laboratory for the Energy and Geology, I.P.—Bioenergy and Biorefineries Unit, Estrada do Paço do Lumiar, 22, Ed. F, 1649-038 Lisbon, Portugal

<sup>2</sup>Instituto Politécnico de Setúbal, Escola Superior de Tecnologia do Barreiro, ESTBarreiro, Rua Américo da Silva Martinho, 2839-001 Lavradio, Portugal

\*Correspondence: isabel.paula@lneg.pt

**Supplementary material**

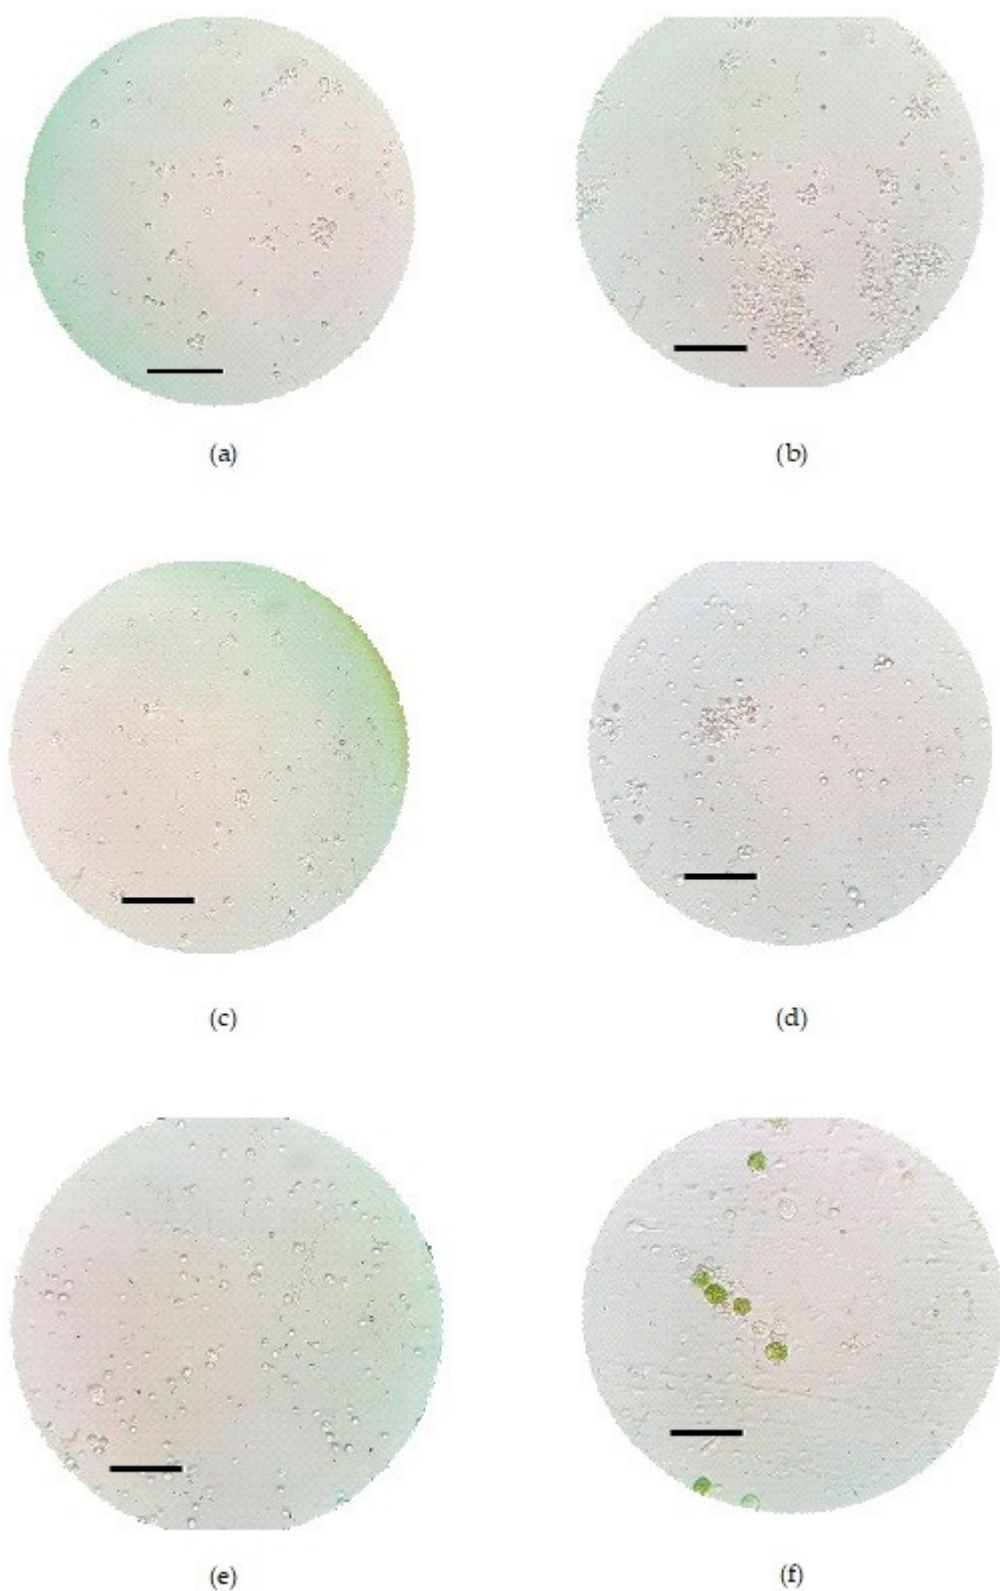

**Figure S1.** The effect of pretreatments on *Chlorella protothecoides* cells seen under an optical microscope. Bar, 5 µm; (a) H—heterotrophic algae; (b) HExt—extracted heterotrophic algae; pretreated heterotrophic algae: (c) HExt—enzymatic; (d) HPA—autoclave; (e) HPU—ultrasound; (f) AA—autotrophic algae.

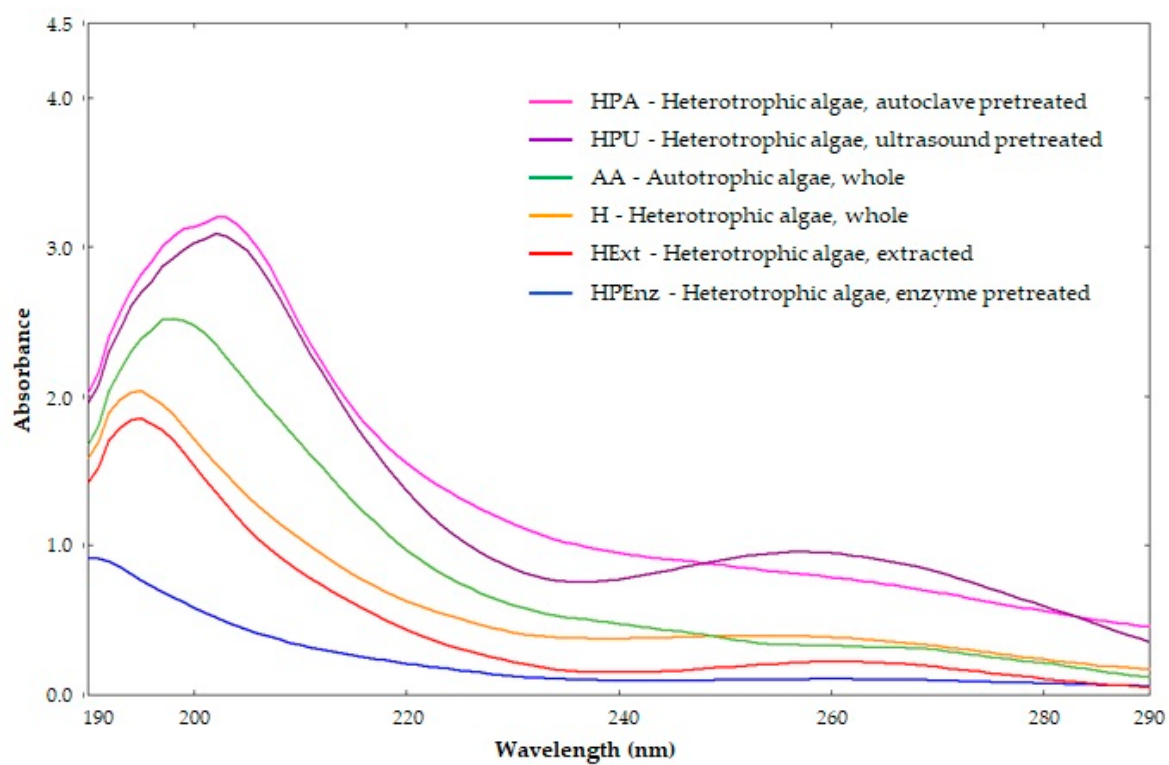

Figure S2. UV spectrum of untreated algae and pretreated algae.

H

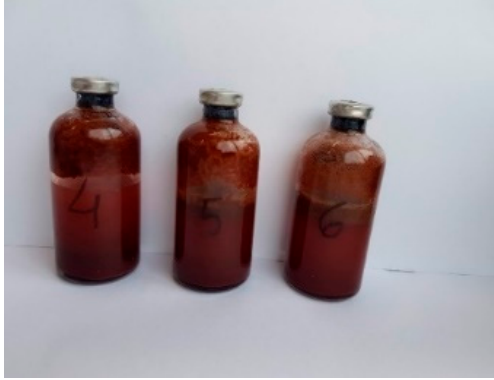

HExt

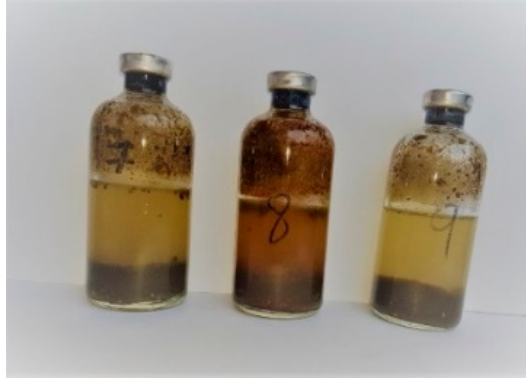

HPEnz

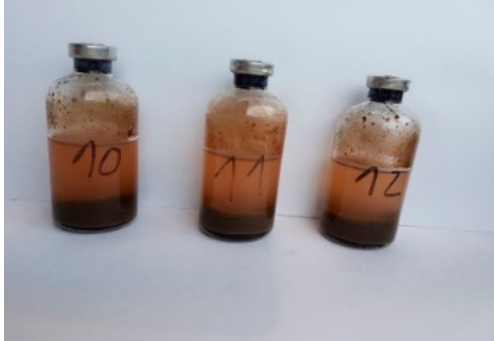

HPA

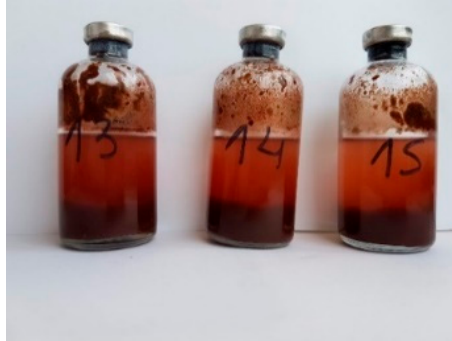

HPU

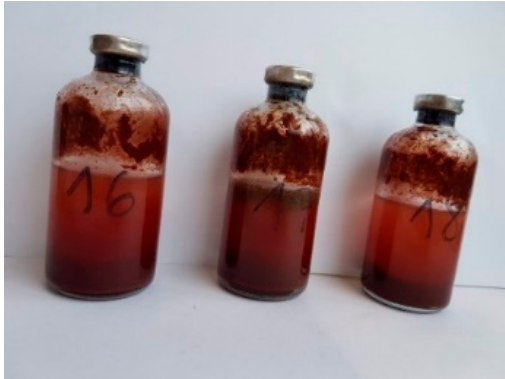

AA

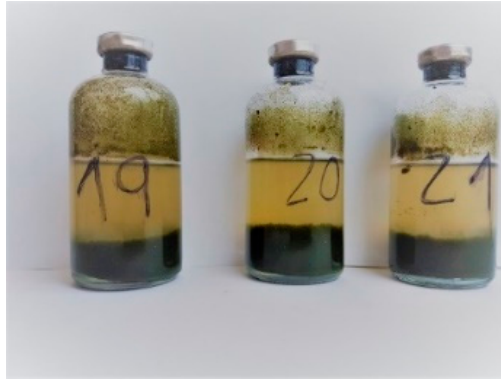

I

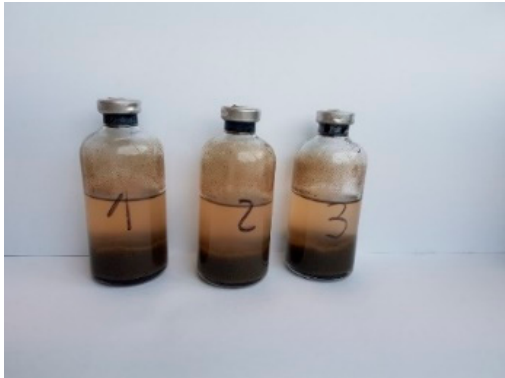

**Figure S3.** Pictures at the end of the anaerobic digestion to see differences in coloration in units. H—heterotrophic algae (4-6); HExt—extracted heterotrophic algae (7-9); pretreated heterotrophic algae: (HPEnz—enzymatic (10-12); HPA—autoclave (13-15); HPU—ultrasound (16-18)); AA—autotrophic algae (19-21); I—inoculum (1-3).

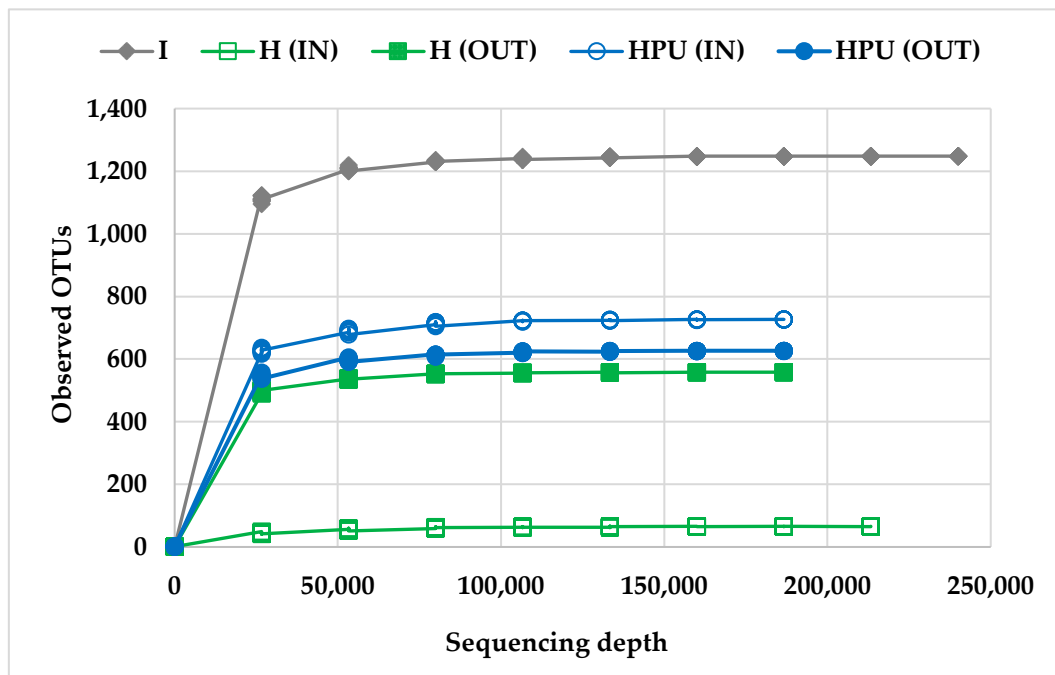

**Figure S4.** Alpha rarefaction curves for the occurrence with which OTUs were detected at each sample from inoculum (I) and samples from anaerobic digestion: H—heterotrophic algae; HPU—pretreated heterotrophic algae. OTU—operational taxonomic unit. The sample names can be looked up in the NCBI bioproject with accession code PRJNA927270.
